# Supplementary material
Source: publisher figshare collection journal article supplement (https://gsapubs.figshare.com/ndownloader/files/22743170)
Supplement: Supplementary file 1 [file 22743170]

RADIOCARBON DATES ON PALEOLANDSLIDES NEAR OTTAWA CANADA  
RADIOCARBON DATES, CALIBRATED CALENDER DATES, LATITUDE AND LONGITUDE, AND FULL SITE AND MATERIAL DESCRIPTIONS

Further information to accompany Table 1 in Aylsworth, J.M., Lawrence, D.E., and Guertin, J., "Did two massive earthquakes in the Holocene induce widespread landsliding and near-surface deformation in part of the Ottawa Valley, Canada?" (manuscript G16308A)

| Sample<br>Site | Latitude   | Longitude  | C14 ID#     | C14 Date<br>(yr B.P.)* | Calibrated calender<br>year** |                                       | Material                          | Enclosing material                                                                                                                          | Depth<br>m | Collection<br>method            | Site description                                                                                                                            |
|----------------|------------|------------|-------------|------------------------|-------------------------------|---------------------------------------|-----------------------------------|---------------------------------------------------------------------------------------------------------------------------------------------|------------|---------------------------------|---------------------------------------------------------------------------------------------------------------------------------------------|
|                |            |            |             |                        | C14<br>intercept              | 2 sigma error<br>range                |                                   |                                                                                                                                             |            |                                 |                                                                                                                                             |
| 1              | 45 24' 50" | 75 16' 45" | Beta-127245 | 4570+/-70              | 3345                          | 3510-3410,<br>3395-3045               | isolated bits of sticks &<br>bark | from 6" black organic layer (well<br>rotted wood pieces) within distorted<br>landslide debris of layered sand,<br>clay and organics         | 0.36       | Livingstone<br>sediment<br>core | pond on landslide within scar area                                                                                                          |
| 2a             | 45 27' 40" | 75 15' 40" | Beta-90880  | 4470+/-80              | 3250,<br>3100                 | 2900-3360                             | wood piece                        | at top of contorted debris of clay &<br>organics with wood; overlain by<br>(lake) fibrous peat; from same core<br>as site 2b                | 1.30       | Livingstone<br>sediment<br>core | large pond on landslide surface &<br>dammed against valley wall by<br>landslide tongue                                                      |
| 2b             | 45 27' 40" | 75 15' 40" | Beta-90881  | 3050+/-70              | 1315                          | 1440-1115,<br>1100-1070               | wood piece                        | in 40 cm of debris of contorted clay<br>& organics with wood: lies between<br>2 layers of (lake) fibrous peat; from<br>same core as site 2a | 0.80       | Livingstone<br>sediment<br>core | large pond on landslide surface &<br>dammed against valley wall by<br>landslide tongue                                                      |
| 3              | 45 26' 30" | 75 13' 20" | Beta-122473 | 4590+/-40              | 3350                          | 3490-3455,<br>3375-3310,<br>3230-3120 | good sized wood piece             | in sandy clay                                                                                                                               | 0.57       | Livingstone<br>sediment<br>core | on landslide, pond contained between<br>well-defined ridges in chaotic, cross &<br>intersect pattern, standing water<br>between many ridges |
| 4              | 45 29' 40" | 75 11' 20" | Beta-122475 | 2760+/-50              | 900                           | 1005-815                              | 2 twigs and org.                  | in sand with many small sticks                                                                                                              | 0.60       | Livingstone<br>sediment<br>core | on landslide, pond contained between<br>well-defined & undisturbed landslide<br>ridges in wooded area                                       |

|    |            |            |             |           |                              |                      |                                                                  |                                                                                                                                                                                                            |      |                           |                                                                                                     |
|----|------------|------------|-------------|-----------|------------------------------|----------------------|------------------------------------------------------------------|------------------------------------------------------------------------------------------------------------------------------------------------------------------------------------------------------------|------|---------------------------|-----------------------------------------------------------------------------------------------------|
| 5  | 45 32' 30" | 75 14' 30" | Beta-127281 | 5130+/-60 | 3960                         | 4035-3785            | large wood piece, cored through log, position within log unknown | in clay, from near bottom of landslide debris                                                                                                                                                              | 4.50 | drill core                | gently sloping landslide tongue                                                                     |
| 6  | 45 31' 15" | 75 16' 00" | Beta-127284 | 4440+/-80 | 3070                         | 3355-2895            | outer rings of large log (hemlock)                               | from landslide debris: mixed red and grey clay, sand and silt, some thixotropic                                                                                                                            | ?    | excavated by farmer       | landslide tongue. Log dug out by farmer during excavation of new manure lagoon.                     |
| 7a | 45 30' 00" | 75 12' 10" | Beta-127243 | 4450+/-70 | 3085                         | 3350-2905            | single stick                                                     | entire core is mixed red and grey clay and sand layers, some very contorted, some mixed, lots of organic bits                                                                                              | 3.00 | drill core                | gently sloping landslide tongue, near toe                                                           |
| 7b | 45 30' 00" | 75 12' 10" | Beta-127244 | 4570+/-70 | 3345                         | 3510-3410, 3395-3045 | 2 small sticks                                                   | from 1/2 inch layer of organic, black muck with some distinct sticks at bottom of same core. -may be original floodplain surface as is underlain by very dense gritty dark grey layer with stones (-till?) | 5.33 | drill core                | gently sloping landslide tongue, near toe                                                           |
| 8  | 45 29' 00" | 75 11' 30" | Beta-122472 | 4520+/-50 | 3320, 3220, 3180, 3165, 3130 | 3360-3035            | collection of small wood bits                                    | in sand which is under thick organic layer                                                                                                                                                                 | 0.45 | Livingstone sediment core | on landslide near headscarp, pond contained between well-defined landslide ridges                   |
| 9  | 45 28' 30" | 75 07' 45" | Beta-127282 | 4540+/-90 | 3335                         | 3510-2920            | wood piece                                                       | from very clayey organic layer with some larger wood bits; layer is surrounded by dense red & grey clay bands                                                                                              | 4.65 | drill core                | landslide tongue near toe                                                                           |
| 10 | 45 31' 30" | 75 00' 40" | Beta-127283 | 4530+/-60 | 3325                         | 3370-3030            | wood pieces from single log, 23cm long, saturated and very soft  | from buried organic layer of black peat with numerous logs; overlain by 1 m of clay                                                                                                                        | 1.00 | ditch section             | On sloping landslide tongue. Drainage ditch exposed several 100 m of buried organic layer with logs |

|     |             |             |             |           |                  |                      |                                                |                                                                                                                                   |      |                           |                                                                                                                                                       |
|-----|-------------|-------------|-------------|-----------|------------------|----------------------|------------------------------------------------|-----------------------------------------------------------------------------------------------------------------------------------|------|---------------------------|-------------------------------------------------------------------------------------------------------------------------------------------------------|
| 11a | 45 30' 50"  | 75 00' 10"  | Beta-122477 | 4450+/-50 | 3085             | 3340-2920            | large seed and small organic bits              | in soft grey clay--lots of grass incorporated at top, some sections crumbly, sand, red clay and organic mixed in (no banding)     | 0.37 | Livingstone sediment core | on landslide, pond contained between well-defined landslide ridges, standing water between many ridges                                                |
| 11b | 45 30' 50"  | 75 00' 10"  | Beta-122478 | 4700+/-50 | 3505, 3425, 3390 | 3630-3355            | mixed organic, lg sample, seed                 | black organic, abrupt contacts both top and bottom; overlain by (LV17-03) clay mixture, underlain by sand                         | 0.49 | Livingstone sediment core | same core as site 11a. Note: Beta-122477 probably a better date of failure                                                                            |
| 12  | 45 31' 30"  | 74 57' 00"  | Beta-122471 | 1870+/-40 | AD 135           | AD 70-245            | minute grassy pieces                           | in very soft grey clay, crumbly (i.e. disturbed) with organic strands; core is layered grey and red clay with some sand and silt. | 0.42 | Livingstone sediment core | on landslide; pond one of many between quite pronounced NNW/SSE ridges -pond cored was dammed at the S end by a beaver dam; sample taken 20m from dam |
| 13  | 45 30' 50"  | 74 56' 15"  | Beta-127242 | 4820+/-70 | 3640             | 3735-3495, 3590-3525 | single piece of wood                           | in buried 8cm organic layer in clay landslide debris, near base of toe                                                            | 1.88 | drill core                | on landslide tongue, 150' from edge of toe                                                                                                            |
| 14  | 45 32' 10"  | 75 09' 30"  | Beta-122474 | 4470+/-50 | 3095             | 3345-2925            | bark and wood, shattered, originally one piece | in sand                                                                                                                           | 0.42 | Livingstone sediment core | on landslide surface near headscarp, pond between well defined ridges                                                                                 |
| 15  | 45° 31' 00" | 75° 25' 00" | GSC-1922    | 4620+/-80 | 3360             | 3505-3415, 3385-3300 | wood                                           |                                                                                                                                   |      | stream exposure           | from GSC Radiocarbon Database                                                                                                                         |

\*Beta = 1sigma error range; GSC = 2 sigma error range

\*\*calibrated dates are BC except for Beta-122471
